# Supplementary material for: Nephelauxetic effect of the hydride ligand in Sr2LiSiO4H as a host material for rare-earth-activated phosphors
Source: Royal Society of Chemistry journal article supplement (doi:10.1039/c8ra08344d), 2019-01-01
Supplement: c8ra08344d1.pdf [file c8ra08344d1.pdf]

**Supplementary Information**

**Nephelauxetic effect of hydride ligand in  $\text{Sr}_2\text{LiSiO}_4\text{H}$  as a host  
material for rare-earth-activated phosphors**

Tong Wu,<sup>a</sup> Asako Ishikawa,<sup>a</sup> Takashi Honda,<sup>b</sup> Hiromu Tamatsukuri,<sup>b</sup> Kazutaka Ikeda,<sup>b</sup> Toshiya Otomo<sup>b</sup> and Satoru Matsuishi<sup>\*a</sup>

<sup>a</sup>Materials Research Center for Element Strategy, Tokyo Institute of Technology, 4259 Nagatsuta-cho, Midori-ku, Yokohama 226-8503, Japan.

<sup>b</sup>Institute of Materials Structure Science, High Energy Accelerator Research Organization, Tsukuba 305-0801, Japan

\*Corresponding author. E-mail address: [matsuishi@mces.titech.ac.jp](mailto:matsuishi@mces.titech.ac.jp)

## Materials

All non-doped and  $\text{Eu}^{2+}$ -doped (2%) samples were directly synthesized by high-temperature reaction of  $\text{Sr}_{2-x}\text{Eu}_x\text{SiO}_4$  ( $x = 0, 0.04$ ) with  $\text{LiX}$  ( $X = \text{H}, \text{F}$ ). Specifically, to prepare the non-doped samples,  $\text{SrCO}_3$  (99.9%, Kojundo Chemical Laboratory co., ltd, Japan) and  $\text{SiO}_2$  (99.9%, Kojundo Chemical Laboratory co., ltd, Japan) were thoroughly mixed in alumina mortar in air at a stoichiometric ratio of 2:1. The mixture was then heated in an alumina boat in a tube furnace with  $\text{N}_2$  gas flow at 1300 °C for 6 h to obtain the precursor  $\text{Sr}_2\text{SiO}_4$ .  $\text{LiH}$  was synthesized by heating Li metal with  $\text{H}_2$  gas in a stainless steel vessel. To prepare  $\text{Sr}_2\text{LiSiO}_4\text{H}$ ,  $\text{Sr}_2\text{SiO}_4$  was thoroughly mixed with  $\text{LiH}$  (1:1.05) in an Ar-filled glove box and pressed into pellet. The pellet was then placed in a vessel and heated at 700 °C for 5 h under 0.9 MPa  $\text{H}_2$  pressure. To prepare  $\text{Sr}_2\text{LiSiO}_4\text{F}$ , the precursor was mixed with  $\text{LiF}$  (99.9%, Kojundo, Japan) at a mole ratio of 1:1.05 in ambient environment and pressed into pellet. The pellet was sintered at 900 °C for 12 h under  $\text{N}_2$  gas flow.

To prepare the Eu-doped samples, the same procedure was used except that the precursor contained Eu. Specifically,  $\text{SrCO}_3$  (99.9%, Kojundo Chemical Laboratory co., ltd, Japan),  $\text{Eu}_2\text{O}_3$  (99.9%, Kojundo Chemical Laboratory co., ltd, Japan), and  $\text{SiO}_2$  (99.9%, Kojundo Chemical Laboratory co., ltd, Japan) were thoroughly mixed in alumina mortar in air at a stoichiometric ratio of 1.96:0.04:1. The mixture was then sintered in an alumina boat placed inside a tube furnace at 1200 °C for 6 h under  $\text{N}_2/\text{H}_2 = 95:5$  gas flow to obtain the precursor with divalent Eu.

For the neutron diffraction measurement, the deuterated and  $^7\text{Li}$ -enriched sample  $\text{Sr}_2^7\text{LiSiO}_4\text{D}$  was synthesized using  $\text{D}_2$  gas (4N) and 99.9%  $^7\text{Li}$ -enriched Li metal ingot.

## Thermal desorption spectroscopy (TDS)

To determine the hydrogen content, TDS was performed (TDS, TDS1400, ESCO, Japan) under vacuum ( $<10^{-7}$  Pa). The temperature was increased from room temperature to 1476 K at a heating rate of 60 K/min.

## Powder x-ray diffraction (XRD)

XRD patterns of the samples were recorded on a D8 Advance diffractometer (Bruker, Germany) with  $\text{Cu K}\alpha$  radiation at room temperature.

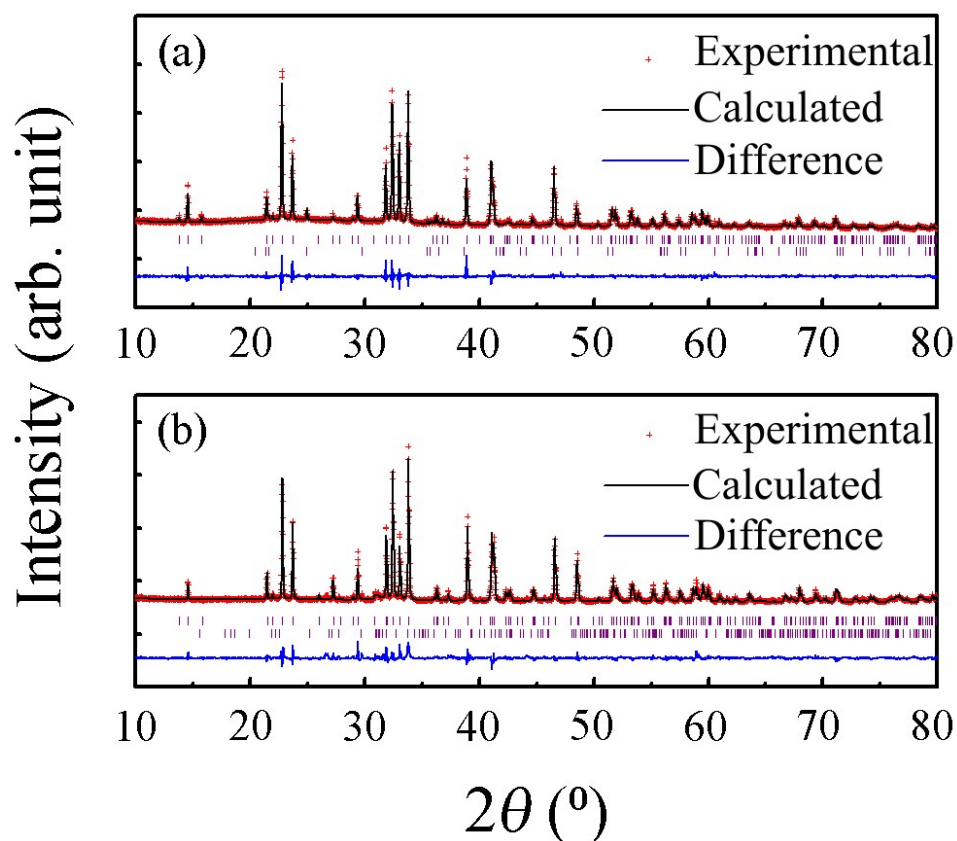

Figure S1. XRD patterns of (a)  $\text{Sr}_2\text{LiSiO}_4\text{H}:\text{Eu}^{2+}$  (impurity phase: 1.36 wt.%  $\text{Li}_2\text{SrSiO}_4$ , GOF = 1.32,  $R_{\text{wp}} = 5.60$ ). (b)  $\text{Sr}_2\text{LiSiO}_4\text{F}:\text{Eu}^{2+}$  (impurity phase: 5.16 wt.%  $\text{Sr}_2\text{SiO}_4$ , GOF = 1.84,  $R_{\text{wp}} = 9.32$ )

### Optical property measurement

Diffuse reflectance spectra of the samples were measured in ambient atmosphere on a U4100 (Hitachi High-Technologies Corp., Japan) spectrophotometer equipped with an integrating sphere and Spectralon SRS-99-010 as a reflection standard. The powder sample was contained in the sample holder with  $\text{SiO}_2$  glass window. The photoluminescence spectra of the samples were measured at room temperature on a F-4500 (Hitachi High-Technologies Corp., Japan) fluorescence spectrophotometer.

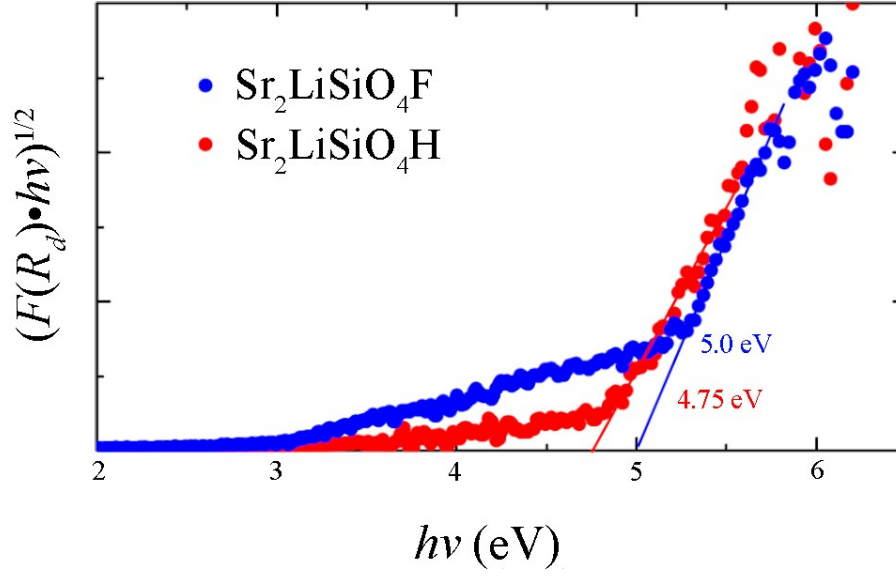

**Figure S2.** Diffuse reflectance spectra of  $\text{Sr}_2\text{LiSiO}_4\text{F}$  and  $\text{Sr}_2\text{LiSiO}_4\text{H}$ . The  $(F(R_d) \cdot hv)^{1/2}$  data of  $\text{Sr}_2\text{LiSiO}_4\text{F}$  were multiplied by 10 so that both sets of data are displayed within the same coordinate axis range.

### Magnetization measurement

To determine Eu valence state in  $\text{Sr}_2\text{LiSiO}_4\text{H}:\text{Eu}^{2+}$  and  $\text{Sr}_2\text{LiSiO}_4\text{F}:\text{Eu}^{2+}$ , magnetization measurements were performed by using a SQUID vibrating sample magnetometer (Quantum Design MPMS). The Magnetization ( $M$ ) versus Magnetic field ( $H$ ) plots were obtained from -70000 Oe to 70000 Oe under the fixed temperature  $T = 2.5$  K. The  $M$  versus Temperature ( $T$ ) plots were obtained from 2.5 K to 300 K with fixed magnetic field  $H = 1$  T. Both  $M$ - $H$  curve and  $M$ - $T$  curve were well-fitted by the equation;

$$M = NgJ\mu_B B_J(x),$$

where  $N$  is the number of atoms,  $B_J(x)$  is Brillouin function<sup>1</sup>;

$$B_J(x) = \frac{2J+1}{2J} \coth\left(\frac{2J+1}{2J}x\right) - \frac{1}{2J} \coth\left(\frac{1}{2J}x\right)$$

and  $x$  is given by  $x = gJ\mu_B/k_B T$  with total angular momentum  $J$ , Landé  $g$ -factor  $g = 2$ , Bohr magneton  $\mu_B = 9.274 \times 10^{-21}$  and Boltzmann constant  $k_B = 1.38065 \times 10^{-16}$ . We chose  $J = 7/2$  which corresponds to  $\text{Eu}^{2+}$  with  $^8\text{S}_{7/2}$  state. Based on the well-fitted curve, we evaluated the number of  $\text{Eu}^{2+}$  and compared with nominal concentration of Eu in the samples. For  $\text{Sr}_2\text{LiSiO}_4\text{H}:\text{Eu}^{2+}$ , the  $M$ - $H$  curve gave the number of  $\text{Eu}^{2+}$  corresponding to 95.2% of nominal Eu content while the  $M$ - $T$  curve gave the value of 89.4%. For  $\text{Sr}_2\text{LiSiO}_4\text{F}:\text{Eu}^{2+}$ , the values of 80.2% and 80.0% were also obtained from  $M$ - $H$  and  $M$ - $T$  curves, respectively. These results indicate the most of Eu atom form divalent states in both  $\text{Sr}_2\text{LiSiO}_4\text{H}:\text{Eu}^{2+}$  and  $\text{Sr}_2\text{LiSiO}_4\text{F}:\text{Eu}^{2+}$  sample.

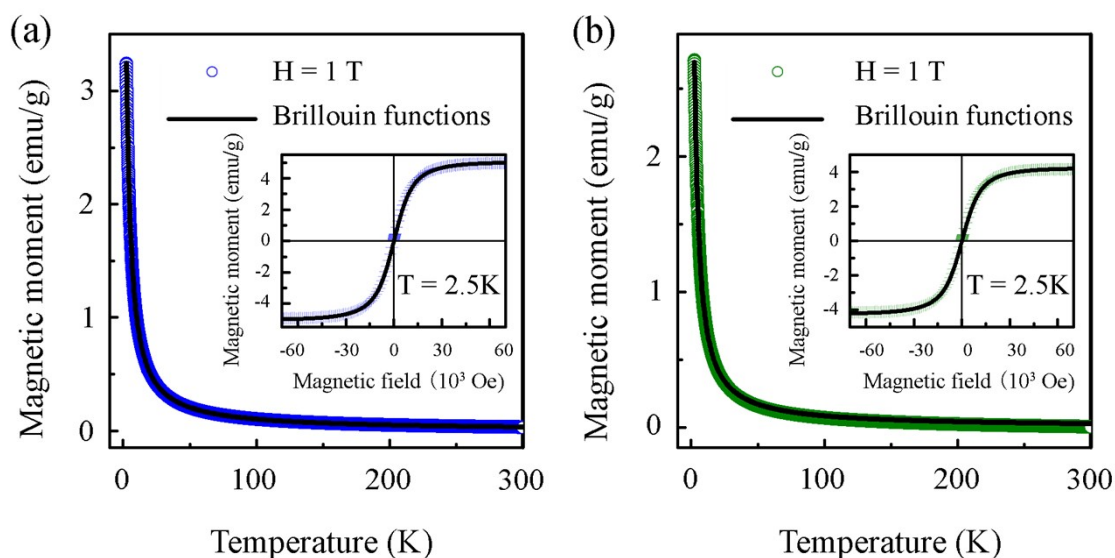

**Figure S3.**  $M$ - $T$  curve and  $M$ - $H$  curve (insert) of (a) Sr<sub>2</sub>LiSiO<sub>4</sub>H:Eu<sup>2+</sup> and (b) Sr<sub>2</sub>LiSiO<sub>4</sub>F:Eu<sup>2+</sup> fitted by Brillouin function with  $J = 7/2$ .

#### Time-of-flight neutron powder diffraction (TOF-NPD)

The TOF-NPD data of the <sup>7</sup>Li-enriched Sr<sub>2</sub>LiSiO<sub>4</sub>D sample were collected at room temperature in a vanadium–nickel alloy holder with a diameter of 6 mm. Rietveld refinement of the data was performed using the Z-Rietveld code.<sup>2</sup>

**Table S1.** Summary of the Rietveld refinement analysis of Sr<sub>2</sub>LiSiO<sub>4</sub>D

|                   |                                      |          |
|-------------------|--------------------------------------|----------|
|                   | $R_{wp}$                             | 2.0935%  |
|                   | $R_p$                                | 1.7904%  |
|                   | $R_{wp}/R_e$                         | 3.441258 |
| Mass ratio (wt.%) | Sr <sub>2</sub> LiSiO <sub>4</sub> D | 97.44(2) |
|                   | SrLi <sub>2</sub> SiO <sub>4</sub>   | 2.12(2)  |
|                   | SrO                                  | 0.44(1)  |
| $R_B$             | Sr <sub>2</sub> LiSiO <sub>4</sub> D | 1.0152%  |
|                   | SrLi <sub>2</sub> SiO <sub>4</sub>   | 4.2738%  |
|                   | SrO                                  | 1.9159%  |
| $R_F$             | Sr <sub>2</sub> LiSiO <sub>4</sub> D | 1.0715%  |
|                   | SrLi <sub>2</sub> SiO <sub>4</sub>   | 1.4514%  |
|                   | SrO                                  | 1.1176%  |

$R_{wp}$ , 2.0935%;  $R_p$ , 1.7904%;  $R_e$ , 0.6084%;  $R_B$ , 1.0152%;  $R_F$ , 1.0715%.

**Phase 1: Sr<sub>2</sub>LiSiO<sub>4</sub>D**

Crystal system: monoclinic

Space group: *P2<sub>1</sub>/m* (11)Lattice parameters:  $a = 6.5820(5)$  Å,  $b = 5.4197(4)$  Å,  $c = 6.9475(5)$  Å,  $\beta = 112.5628(2)$  °**Table S2.** Atomic coordinates, occupancy and isotropic displacement parameters of Sr<sub>2</sub>LiSiO<sub>4</sub>D

|        | Occupancy | <i>x</i>    | <i>y</i>    | <i>z</i>    | <i>U</i> <sub>iso</sub> (10 <sup>-2</sup> Å <sup>2</sup> ) |
|--------|-----------|-------------|-------------|-------------|------------------------------------------------------------|
| Sr1 2e | 1         | 0.16090(4)  | 1/4         | 0.37365(4)  | 0.936(9)                                                   |
| Sr2 2e | 1         | 0.63362(5)  | 1/4         | 0.89818(4)  | 0.774(10)                                                  |
| Li1 2e | 1.000(2)  | 0.15003(14) | 1/4         | 0.87596(14) | 1.116(35)                                                  |
| Si1 2e | 1         | 0.65322(8)  | 1/4         | 0.33402(7)  | 0.547(12)                                                  |
| O1 2e  | 1         | 0.40260(6)  | 1/4         | 0.15666(6)  | 0.777(9)                                                   |
| O2 4f  | 1         | 0.22628(4)  | -0.00820(4) | 0.71201(4)  | 0.889(9)                                                   |
| O3 2e  | 1         | 0.65916(6)  | 1/4         | 0.56780(4)  | 1.624(12)                                                  |
| D1 2a  | 1.000(1)  | 0           | 0           | 0           | 1.987(14)                                                  |

**Table S3.** Isotropic displacement parameters of Sr<sub>2</sub>LiSiO<sub>4</sub>D (×10<sup>-2</sup> Å<sup>2</sup>)

|     | <i>U</i> <sub>11</sub> | <i>U</i> <sub>22</sub> | <i>U</i> <sub>33</sub> | <i>U</i> <sub>12</sub> | <i>U</i> <sub>13</sub> | <i>U</i> <sub>23</sub> |
|-----|------------------------|------------------------|------------------------|------------------------|------------------------|------------------------|
| Sr1 | 0.983(19)              | 1.222(20)              | 0.603(17)              | 0                      | 0.530(15)              | 0                      |
| Sr2 | 1.015(20)              | 0.688(22)              | 0.619(21)              | 0                      | 0.391(17)              | 0                      |
| Li1 | 0.913(61)              | 1.593(60)              | 0.841(57)              | 0                      | 0.592(48)              | 0                      |
| Si1 | 0.772(30)              | 0.564(27)              | 0.306(27)              | 0                      | 0.168(22)              | 0                      |
| O1  | 0.205(24)              | 1.439(24)              | 0.685(20)              | 0                      | 0.015(17)              | 0                      |
| O2  | 1.251(19)              | 0.472(14)              | 0.944(16)              | 0.485(14)              | 0.524(15)              | -0.008(12)             |
| O3  | 2.684(24)              | 1.783(23)              | 0.405(21)              | 0                      | 0.973(19)              | 0                      |
| D1  | 1.687(26)              | 1.907(25)              | 2.366(24)              | 0.035(16)              | 0.751(20)              | 0.071(19)              |

**Phase 2:** SrLi<sub>2</sub>SiO<sub>4</sub>

Crystal system: Trigonal

Space group: *P*3<sub>1</sub>2<sub>1</sub> (152)Lattice parameters:  $a = 5.0238(35)$  Å,  $c = 12.4580(12)$  Å**Table S4.** Atomic coordinates, occupancy and isotropic displacement parameters of SrLi<sub>2</sub>SiO<sub>4</sub>

|        | <i>x</i>   | <i>y</i>   | <i>z</i>   | $U_{\text{iso}} (\times 10^{-2} \text{ \AA}^2)$ |
|--------|------------|------------|------------|-------------------------------------------------|
| Sr1 6c | 0.4118(9)  | 0          | 1/3        | 0.633                                           |
| Li1 3a | 0.0955(22) | 0.3909(32) | 0.4136(12) | 0.633                                           |
| Si1 3b | 0.2997(16) | 0          | 5/6        | 0.633                                           |
| O1 6c  | 0.0386(9)  | 0.4940(11) | 0.0566(3)  | 0.633                                           |
| O2 6c  | 0.2968(8)  | 0.2396(8)  | 0.1691(4)  | 0.633                                           |

**Phase 3:** SrO

Crystal system: Cubic

Space group: *Fm*-3*m* (225)Lattice parameter:  $a = 5.1565(45)$  Å**Table S5.** Atomic coordinates, occupancy and isotropic displacement parameters of SrO

|        | <i>x</i> | <i>y</i> | <i>z</i> | $U_{\text{iso}} (\times 10^{-2} \text{ \AA}^2)$ |
|--------|----------|----------|----------|-------------------------------------------------|
| Sr1 4a | 0        | 0        | 0        | 0.633                                           |
| O1 4b  | 1/2      | 1/2      | 1/2      | 0.633                                           |

**Table S6.** Interatomic distances in Sr<sub>2</sub>LiSiO<sub>4</sub>F and Sr<sub>2</sub>LiSiO<sub>4</sub>D

|                       | Sr <sub>2</sub> LiSiO <sub>4</sub> F                                                                        |               | Sr <sub>2</sub> LiSiO <sub>4</sub> D                                                                        |                 |
|-----------------------|-------------------------------------------------------------------------------------------------------------|---------------|-------------------------------------------------------------------------------------------------------------|-----------------|
| Lattice parameters    | $a = 6.5825(9) \text{ \AA}, b = 5.4158(8) \text{ \AA}, c = 6.9266(6) \text{ \AA}, \beta = 112.525(8)^\circ$ |               | $a = 6.5868(2) \text{ \AA}, b = 5.4219(1) \text{ \AA}, c = 6.9498(2) \text{ \AA}, \beta = 112.556(2)^\circ$ |                 |
| Interatomic distances | Sr1-O1                                                                                                      | 2.578(9) \AA  | Sr1-O1                                                                                                      | 2.578(5) \AA    |
|                       | Sr1-O2                                                                                                      | 2.708(6) \AA  | Sr1-O2                                                                                                      | 2.721(3) \AA    |
|                       | Sr1-O3                                                                                                      | 2.911(3) \AA  | Sr1-O3                                                                                                      | 2.9226(10) \AA  |
|                       | Sr1-F1                                                                                                      | 2.7401(7) \AA | Sr1-D1                                                                                                      | 2.7544(3) \AA   |
|                       | Sr2-O1                                                                                                      | 2.7341(9) \AA | Sr2-O1                                                                                                      | 2.73416(15) \AA |
|                       | Sr2-O2                                                                                                      | 2.817(6) \AA  | Sr2-O2                                                                                                      | 2.8259(11) \AA  |
|                       | Sr2-O3                                                                                                      | 2.347(8) \AA  | Sr2-O3                                                                                                      | 2.365(3) \AA    |
|                       | Sr2-F1                                                                                                      | 2.613 (1) \AA | Sr2-D1                                                                                                      | 2.6158(3) \AA   |

The Sr<sub>2</sub>LiSiO<sub>4</sub>F data were obtained from the literature,<sup>3</sup> whereas the Sr<sub>2</sub>LiSiO<sub>4</sub>D data were obtained from the TOF-NPD measurements.

### DFT calculations

Single-shot  $G_0W_0$  calculations with  $3 \times 4 \times 3$  mesh and density functional theory calculations, using the projector-augmented wave method and a Perdew–Burke–Ernzerhof exchange correlation functional implemented in VASP code, were performed to determine the bandgap energies of the host materials.<sup>4-7</sup> To investigate the optical energy transitions from Eu 4f to 5d in Sr<sub>2</sub>LiSiO<sub>4</sub>H and Sr<sub>2</sub>LiSiO<sub>4</sub>F, constrained density functional theory (cDFT) calculations were performed with a plane-wave cutoff energy of 500 eV as wave function. The  $2 \times 2 \times 1$  supercells (Sr<sub>31</sub>Eu<sub>1</sub>Li<sub>16</sub>Si<sub>16</sub>O<sub>64</sub>H<sub>16</sub>), which were derived from the calculated Eu-free system, contain 144 atoms with one Eu atom substituted on the Sr1 site and Sr2 site. The DFT+U method<sup>8</sup> was used for localizing the Eu f electrons with  $U = 6$  eV for both hydride and fluoride materials.



**Table S7.** Bond lengths and bond angles of Eu coordination in Sr1 site in the  $A_0^*$  state (structure optimized for  $A_0$  state)

| Sr <sub>2</sub> LiSiO <sub>4</sub> H |                 |          |                | Sr <sub>2</sub> LiSiO <sub>4</sub> F |                 |          |                |
|--------------------------------------|-----------------|----------|----------------|--------------------------------------|-----------------|----------|----------------|
|                                      | Bond length (Å) |          | Bond angle (Å) |                                      | Bond length (Å) |          | Bond angle (Å) |
| Eu-O1                                | 2.603           | O1-Eu-H  | 62.995         | Eu-O1                                | 2.616           | O1-Eu-F  | 62.774         |
|                                      |                 |          | 62.980         |                                      |                 |          | 62.774         |
| Eu-O2                                | 2.716           | O2-Eu-O2 | 58.296         | Eu-O2                                | 2.722           | O2-Eu-O2 | 58.326         |
|                                      | 2.724           |          |                |                                      | 2.722           |          |                |
|                                      | 2.639           |          | 64.198         |                                      | 2.619           |          | 64.894         |
|                                      | 2.639           |          |                |                                      | 2.619           |          |                |
| Eu-O3                                | 2.969           | O3-Eu-O3 | 135.065        | Eu-O3                                | 2.950           | O3-Eu-O3 | 135.894        |
|                                      | 2.969           |          |                |                                      | 2.950           |          |                |
|                                      | 3.078           | O3-Eu-H  | 112.111        |                                      | 3.077           | O3-Eu-F  | 111.940        |
|                                      |                 |          | 112.113        |                                      |                 |          | 111.940        |
| Eu-H                                 | 2.765           | H-Eu-H   | 58.994         | Eu-F                                 | 2.810           | F-Eu-F   | 58.427         |
|                                      | 2.765           |          |                |                                      | 2.810           |          |                |

In Sr1 substitution, Eu coordinates with one O1, four O2, three O3 atoms and two  $X$  ( $X = F, H$ ) atoms.

**Table S8.** Bond lengths and bond angles of Eu coordination in Sr2 site in the  $A_0^*$  state (structure optimized for  $A_0$  state)

| Sr <sub>2</sub> LiSiO <sub>4</sub> H |                 |          |                    | Sr <sub>2</sub> LiSiO <sub>4</sub> F |                 |          |                    |
|--------------------------------------|-----------------|----------|--------------------|--------------------------------------|-----------------|----------|--------------------|
|                                      | Bond length (Å) |          | Bond angle (Å)     |                                      | Bond length (Å) |          | Bond angle (Å)     |
| Eu-O1                                | 2.760           | O1-Eu-O1 | 164.213            | Eu-O1                                | 2.759           | O1-Eu-O1 | 164.294            |
|                                      | 2.760           |          |                    |                                      | 2.759           |          |                    |
|                                      | 2.833           | O1-Eu-H  | 120.636<br>120.654 |                                      | 2.787           | O1-Eu-F  | 120.164<br>120.164 |
|                                      |                 |          |                    |                                      |                 |          |                    |
| Eu-O2                                | 2.849           | O2-Eu-O2 | 55.493             | Eu-O2                                | 2.857           | O2-Eu-O2 | 55.406             |
|                                      | 2.848           |          |                    |                                      | 2.857           |          |                    |
|                                      | 2.937           | 57.405   | 2.905              |                                      | 57.889          |          |                    |
|                                      | 2.935           |          | 2.905              |                                      |                 |          |                    |
| Eu-O3                                | 2.362           | O3-Eu-H  | 83.227<br>83.222   | Eu-O3                                | 2.360           | O3-Eu-F  | 82.447<br>82.447   |
|                                      |                 |          |                    |                                      |                 |          |                    |
| Eu-H                                 | 2.574           | H-Eu-H   | 63.615             | Eu-F                                 | 2.634           | F-Eu-F   | 62.592             |
|                                      | 2.574           |          |                    |                                      | 2.634           |          |                    |

In Sr2 substitution, Eu coordinates with three O1, four O2, one O3 atoms and two  $X$  ( $X = F, H$ ) atoms.

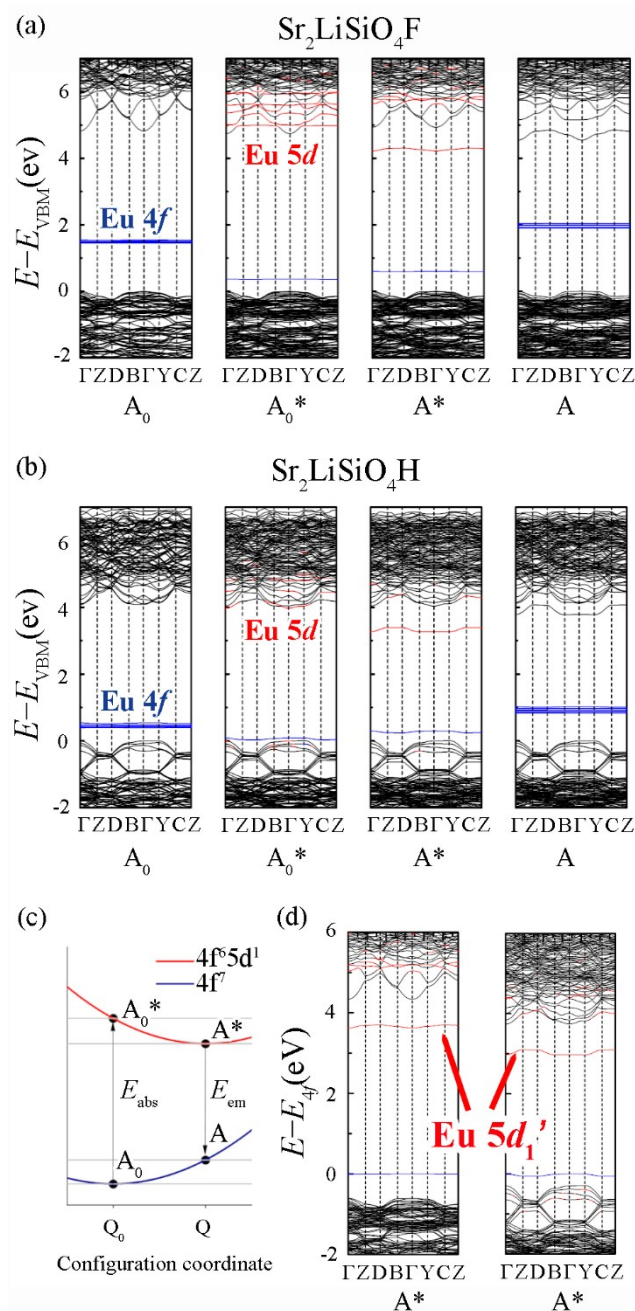

**Figure S3.** Band structures showing the electronic states (ground state  $A_0$ , excited state  $A_0^*$ , excited state after structure relaxation  $A^*$ , ground state  $A$ ) of (a)  $\text{Sr}_2\text{LiSiO}_4\text{F}$  and (b)  $\text{Sr}_2\text{LiSiO}_4\text{H}$ . (c) Configuration coordinate diagram. Band structures showing the  $A^*$  states of (d)  $\text{Sr}_2\text{LiSiO}_4\text{F}$  (left) and  $\text{Sr}_2\text{LiSiO}_4\text{H}$  (right). For better comparison of the Eu  $5d$  lowest band in each excited state, the Eu  $4f$  energy level was set as 0 eV for both  $\text{Sr}_2\text{LiSiO}_4\text{F}$  and  $\text{Sr}_2\text{LiSiO}_4\text{H}$ .

## References

- 1 C. Kittel, *Introduction to Solid State Physics*, 2004.
- 2 R. Oishi, M. Yonemura, Y. Nishimaki, S. Torii, A. Hoshikawa, T. Ishigaki, T. Morishima, K. Mori and T. Kamiyama, *Nucl. Instruments Methods Phys. Res. Sect. A Accel. Spectrometers, Detect. Assoc. Equip.*, 2009, **600**, 94–96.
- 3 A. Akella and D. A. Keszler, *Chem. Mater.*, 1995, **7**, 1299–1302.
- 4 P. E. Blöchl, *Phys. Rev. B*, 1994, **50**, 17953–17979.
- 5 G. Kresse and J. Furthmüller, *Phys. Rev. B - Condens. Matter Mater. Phys.*, 1996, **54**, 11169–11186.
- 6 J. P. Perdew, K. Burke and M. Ernzerhof, *Phys. Rev. Lett.*, 1996, **77**, 3865–3868.
- 7 M. Van Schilfgaarde, T. Kotani and S. Faleev, *Phys. Rev. Lett.*, 2006, **96**, 1–4.
- 8 L. A. I, *J. Phys. Condens. Matter*, 1997, **9**, 767.
